# Supplementary material for: PtNi alloy nanoparticles grownin situon nitrogen doped carbon for the efficient oxygen reduction reaction
Source: Royal Society of Chemistry journal article supplement (doi:10.1039/d3dt01124k), 2023-01-01
Supplement: d3dt01124k1.pdf [file d3dt01124k1.pdf]

## Supplementary Materials for

### **PtNi alloy nanoparticles grown in situ on nitrogen doped carbon for efficient oxygen reduction reaction**

Weiqi Ye<sup>[a]</sup>, Zhenyu Wu<sup>[a]</sup>, Shengqi Zhang<sup>[a]</sup>, Yi Sun<sup>\*[b]</sup>, Xiaoyan Zhang<sup>\*[a]</sup>, Wei  
Zhou<sup>\*[a]</sup>, Weimin Cao<sup>[a]</sup>, Tao Wang<sup>[b]</sup>, Danhong Cheng<sup>[a]</sup>, Haijiao Xie<sup>[c]</sup>

[a] Dr. X. Zhang, Dr. W. Zhou, Dr. W. Cao, Prof. D. Cheng, Z. Wu, S. Zhang, Department of Chemistry,  
College of Sciences, Shanghai University, Shanghai 200444 (P. R. China) E-mail:  
xyzhang\_dd@shu.edu.cn; zhouw@shu.edu.cn

[b] Y. Sun, Aerospace Hydrogen Energy Technology (Shanghai) Co. Ltd., Shanghai 201800 (P. R.  
China) E-mail: sunyi082032@163.com

#### **Contents:**

Materials and Methods

Figures S1 to S11

Table S1 to S3

## Materials and methods

**Synthesis of NC nanoparticles:** Two types of nitrogen doped carbon (NC) were prepared by hydrothermal and thermal annealing methods, respectively. Typically, 120 mg carbon (XC-72R), 280 mg urea, 20 mL ethanol and 20 mL deionized water were well mixed by 1 h ultrasonication. The solution was autoclave treated at 180°C for 14 h. After centrifugation with ethanol, the product was labeled as NC(H). In another typical synthesis method, 120 mg carbon (XC-72R), 280 mg urea and 10 mL ethanol were stirring in the oil bath at 80°C for 30 min. After centrifugation and drying in vacuum experimental box, the solids were annealed for 5 h in Ar atmosphere at 650°C with a ramp rate of 10°C/min. The obtained product was labeled as NC(T).

**Synthesis of PtNi NPs:** 13 mL  $\text{H}_2\text{PtCl}_6 \cdot 6\text{H}_2\text{O}$  in ethanol (1.5  $\text{mg}_{\text{Pt}}/\text{mL}$ ), 25 mg  $\text{Ni}(\text{acac})_2 \cdot 4\text{H}_2\text{O}$ , 80 mg CTAC and 40 mL OAM were added into the solution and stirred magnetically for 6 h. The homogeneous solution was transferred into a 100 mL Teflon-lined autoclave and heated at 180 °C for 14 h. After cooling down to room temperature, the resultant was collected by centrifugation with an ethanol/acetone mixture (volume ratio of 3/1) for three times and etched in nitric acid ( $\text{HNO}_3$ , 0.5 M) to remove Ni from active site and obtain PtNi NPs.

**Synthesis of PtNi/NC[H] NPs:** The above synthesized PtNi NPs were further supported on the NC(H) synthesized by hydrothermal mixing, which performed more active for ORR than NC(T). In a typical process, 40 mg NC(H) and 10 mg PtNi NPs were dispersed in 40 mL OAM. The homogeneous black solution was mixed in cyclohexane under stirring for 12 h and dried at oven at 50 °C. The product was labeled as PtNi/NC[H]. The resultant product was fully grinded and annealed for 4 h in Ar atmosphere at 350°C. The product was labeled as PtNi/NC[H]-350.

## Figures

Figure S1

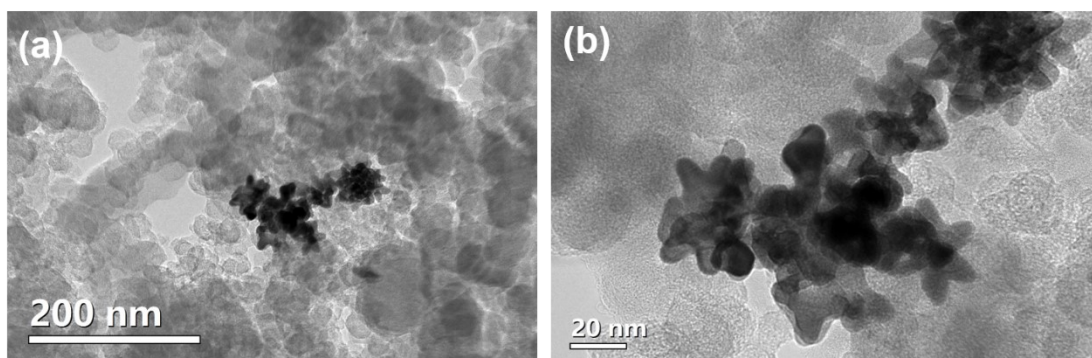

Figure S1. TEM images of PtNi/NC[H]-350 synthesized by a two-step hydrothermal method.

Figure S2

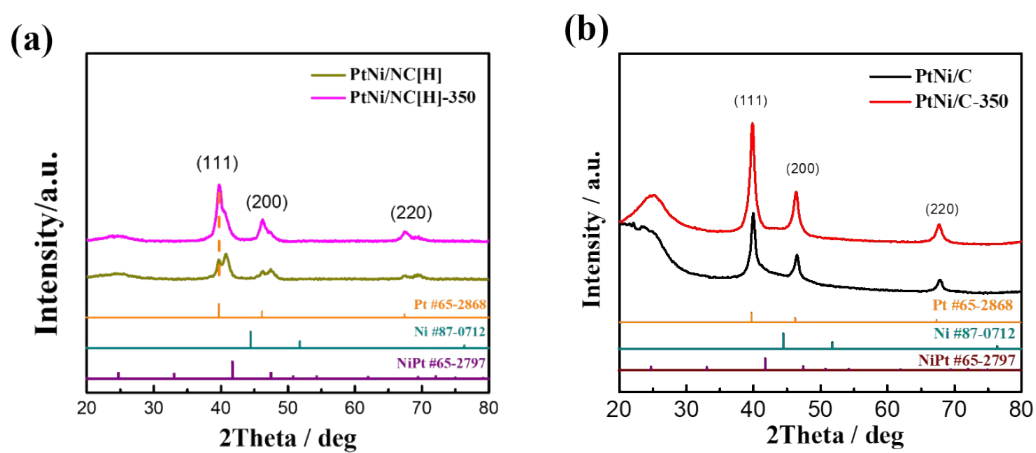

Figure S2. (a) XRD patterns of PtNi/NC[H] and PtNi/NC[H]-350 synthesized by a two-step hydrothermal method. (b) XRD patterns of PtNi/C and PtNi/C-350 synthesized without urea by a one-pot method.

Figure S3

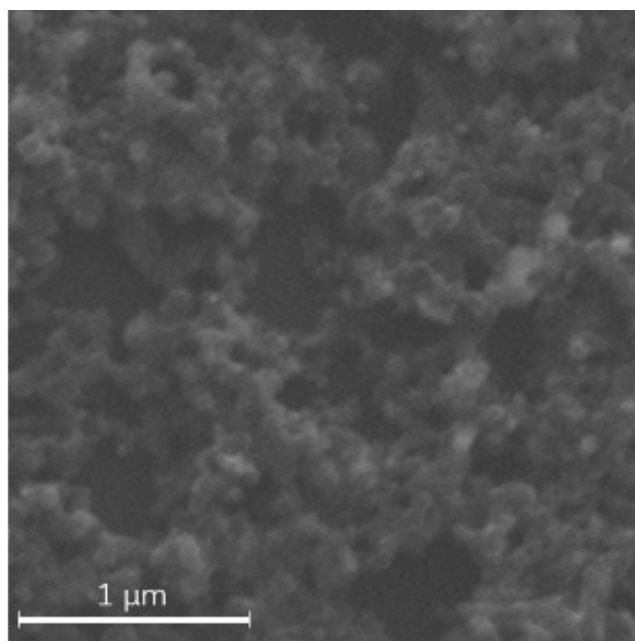

Figure S3. SEM images of PtNi/NC-350 after etching process.

Figure S4

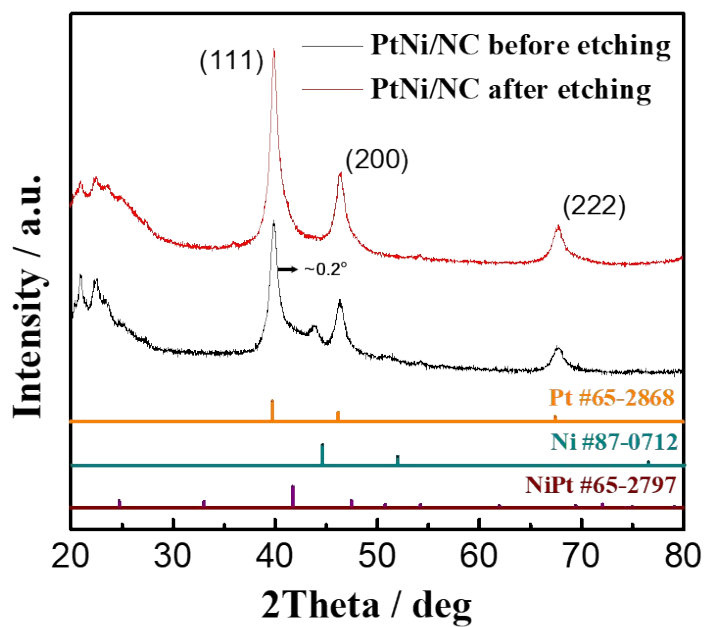

Figure S4. XRD patterns of PtNi/NC before and after HNO<sub>3</sub> etching.

Figure S5

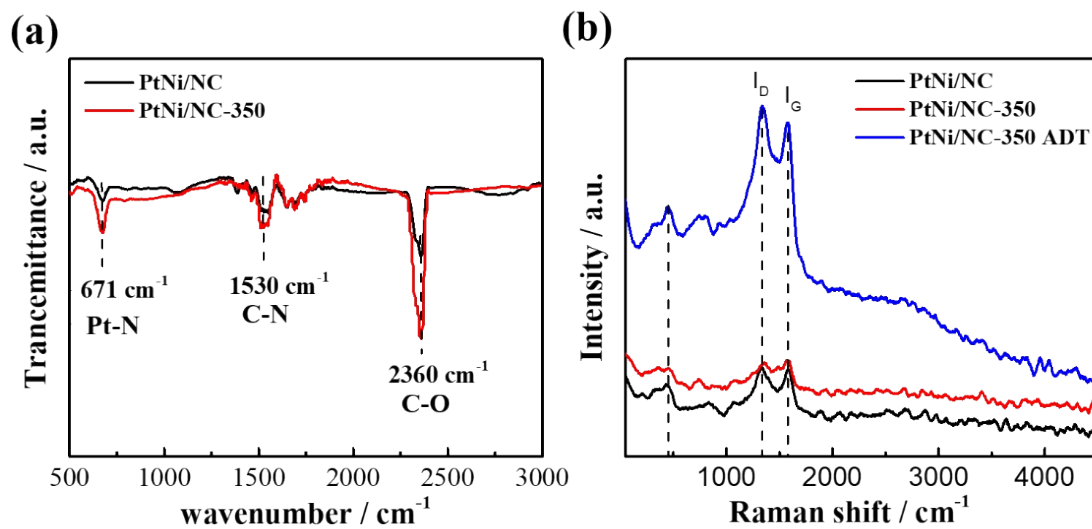

Figure S5. (a) FTIR and (b) Raman spectra of PtNi/NC and PtNi/NC-350.

Figure S6

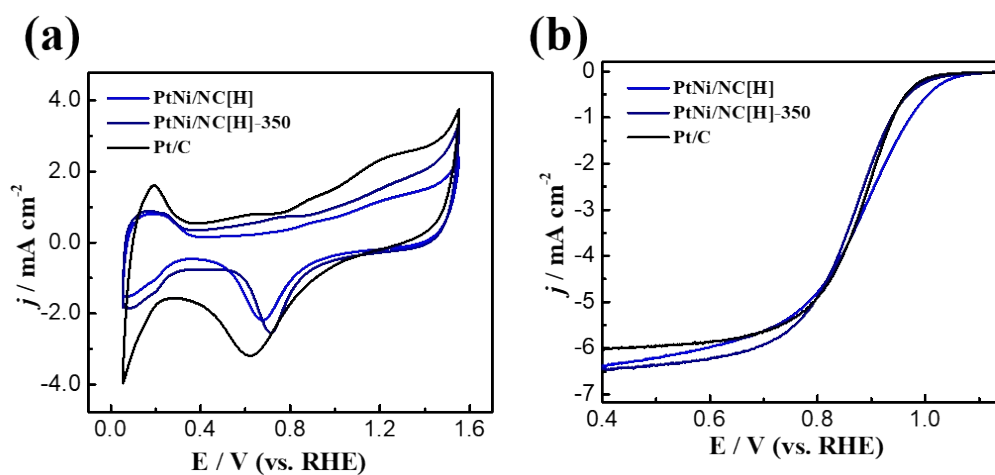

Figure S6. The ORR performance of PtNi/NC[H] before and after annealing treatment and commercial Pt/C. (a) Cyclic voltammograms (CVs) in  $\text{N}_2$ -saturated 0.1 M  $\text{HClO}_4$  electrolyte at 50 mV/s. (b) Linear sweep voltammograms (LSVs) in  $\text{O}_2$ -saturated electrolyte at 5 mV/s.

Figure S7

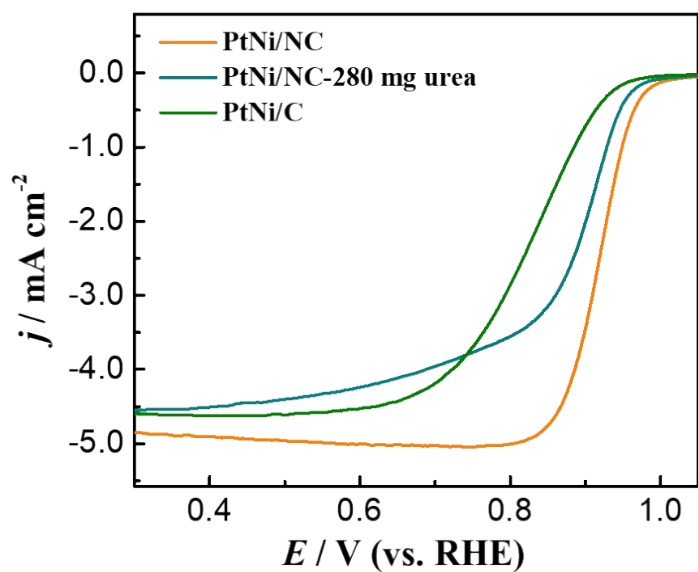

Figure S7. Linear sweep voltammetry (LSV) curves for different samples in O<sub>2</sub>-saturated electrolyte at 5 mV/s

Figure S8

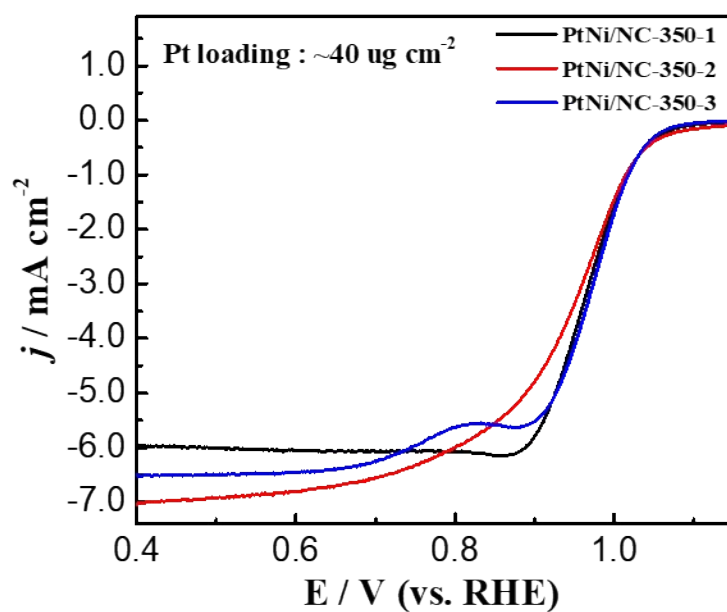

Fig. S8 PtNi/NC reproducible tests of ORR polarization for PtNi/NC-350 with ~ 40 μg·cm<sup>-2</sup> Pt loading.

Figure S9

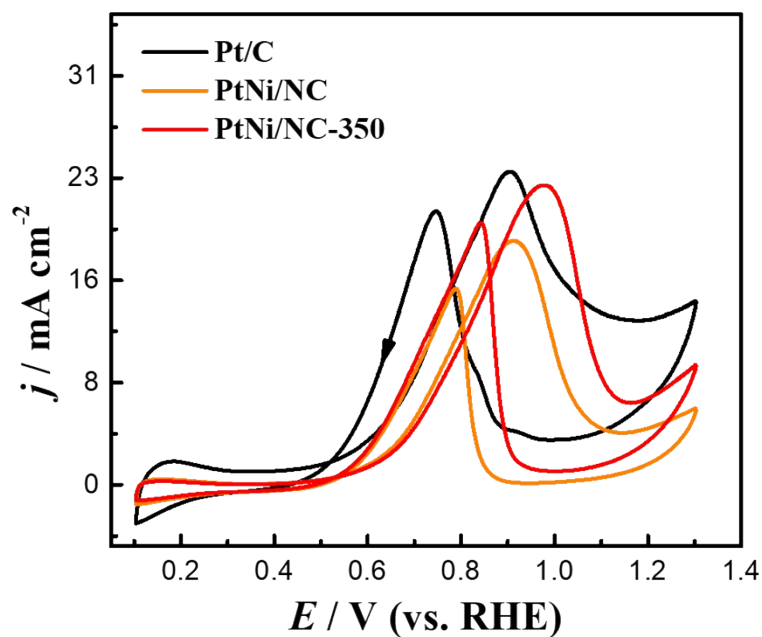

Figure S9. Cyclic voltammograms (CVs) curves of the prepared samples in 0.1 M HClO<sub>4</sub> and 1 M CH<sub>3</sub>OH electrolyte at 50 mV/s.

Figure S10

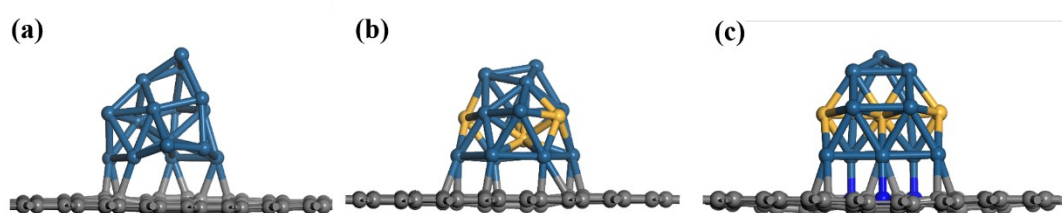

Figure S10. Optimized Models of Pt/C, Pt<sub>4</sub>Ni/C and Pt<sub>4</sub>Ni/NC. Color mode: gray blue: Pt; yellow: Ni; light blue: N; gray: C. The bond of Pt-Left Ni (Same site for Pt in Pt/C) in average calculated as 2.68, 2.48, 2.52 Å for Pt/C, PtNi/C and PtNi/NC. The bond of Pt-right Ni (Same site for Pt in Pt/C) in average calculated as 2.57, 2.46 and 2.54 Å for Pt/C, PtNi/C and PtNi/NC, in consistent with the experimentally synthesized catalysts.

**Figure S11**

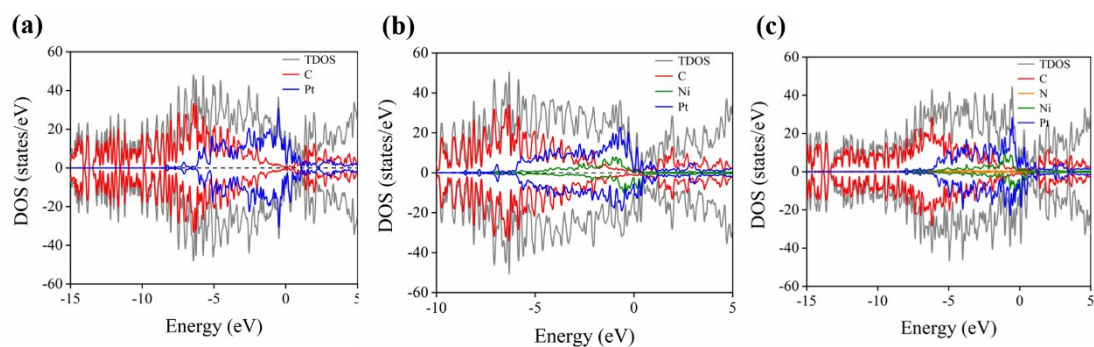

**Figure S11.** The total density of states and partial density of Pt, C, Ni, N states of Pt/C, PtNi/C and PtNi/NC.

**Table S1.** The atomic ratio of Pt, Ni and N element in PtNi/NC and PtNi/NC-350 obtained by XPS and ICP-OES profiles, respectively.

| Samples                        | XPS      |          |         | ICP      |          |                  |
|--------------------------------|----------|----------|---------|----------|----------|------------------|
|                                | Pt (at%) | Ni (at%) | N (at%) | Pt (wt%) | Ni (wt%) | Pt/Ni atom ratio |
| PtNi/NC without acid treatment | /        | /        | /       | 8.217    | 4.457    | 1:2              |
| PtNi/NC                        | 0.44     | 0.26     | 1.37    | 8.678    | 0.680    | 4:1              |
| PtNi/NC-350                    | 0.55     | 0.30     | 0.87    | /        | /        |                  |



**Table S2.** PtNi/NC-350 reproducible tests of mass activity (MA) with  $\sim 40 \mu\text{g cm}^{-2}$  Pt loading.

|                                                  | PtNi-350-1 | PtNi-350-2 | PtNi-350-3 | Average value<br>of MA | Standard<br>deviation of MA |
|--------------------------------------------------|------------|------------|------------|------------------------|-----------------------------|
| $J_{0.9V}$ ( $\text{mA}\cdot\text{cm}^{-2}$ )    | 5.52       | 4.9        | 5.8        | /                      | /                           |
| MA ( $\text{A}\cdot\text{mg}_{\text{Pt}}^{-1}$ ) | 0.84       | 0.6        | 1.05       | 0.83                   | 0.18                        |

**Table S3.** d band center calculation of Pt/C, PtNi/C and PtNi/NC.

|         | d-band-Center (UP)<br>(eV) | d-band-Center<br>(DOWN) (eV) | d-band-Center<br>(Average) (eV) |
|---------|----------------------------|------------------------------|---------------------------------|
| Pt/C    | -2.0287                    | -1.9741                      | -2.0014                         |
| PtNi/C  | -2.0171                    | -1.734                       | -1.8757                         |
| PtNi/NC | -2.0615                    | -1.8181                      | -1.9399                         |
